# Supplementary material
Source: publisher site journal article supplement (https://www.spandidos-publications.com/8676/downloadSupplementary)

Figure S1. Forest plots of grade  $\geq 3$  adverse effects. (A) Anemia. (B) Hypertension. P\_het, P-value for heterogeneity; ES, effect size.

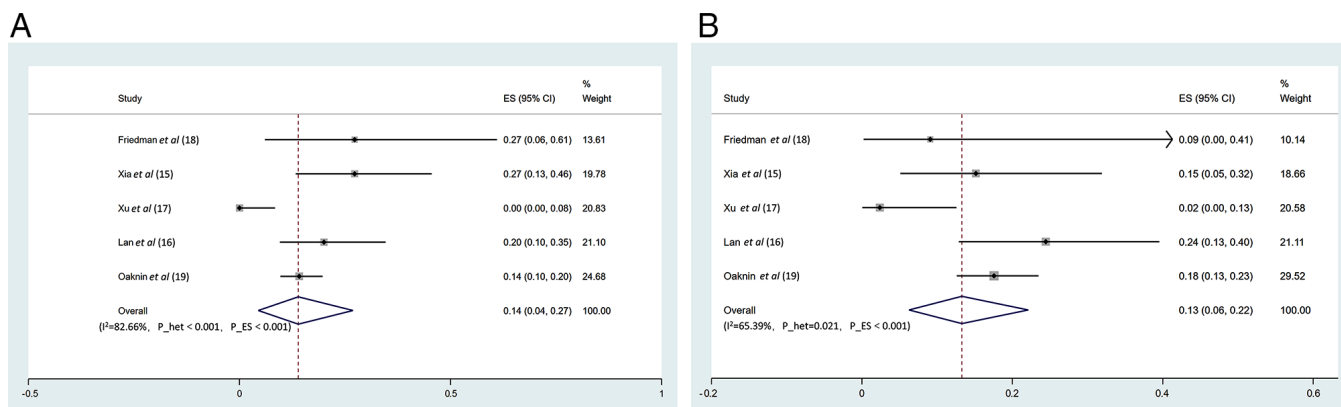

Figure S2. Forest plots of grade 1-2 adverse effects. (A) Proteinuria. (B) Increased aspartate aminotransferase. (C) Increased alanine aminotransferase levels. (D) Diarrhea. (E) Decreased platelet levels. P<sub>het</sub>, P-value for heterogeneity; ES, effect size.

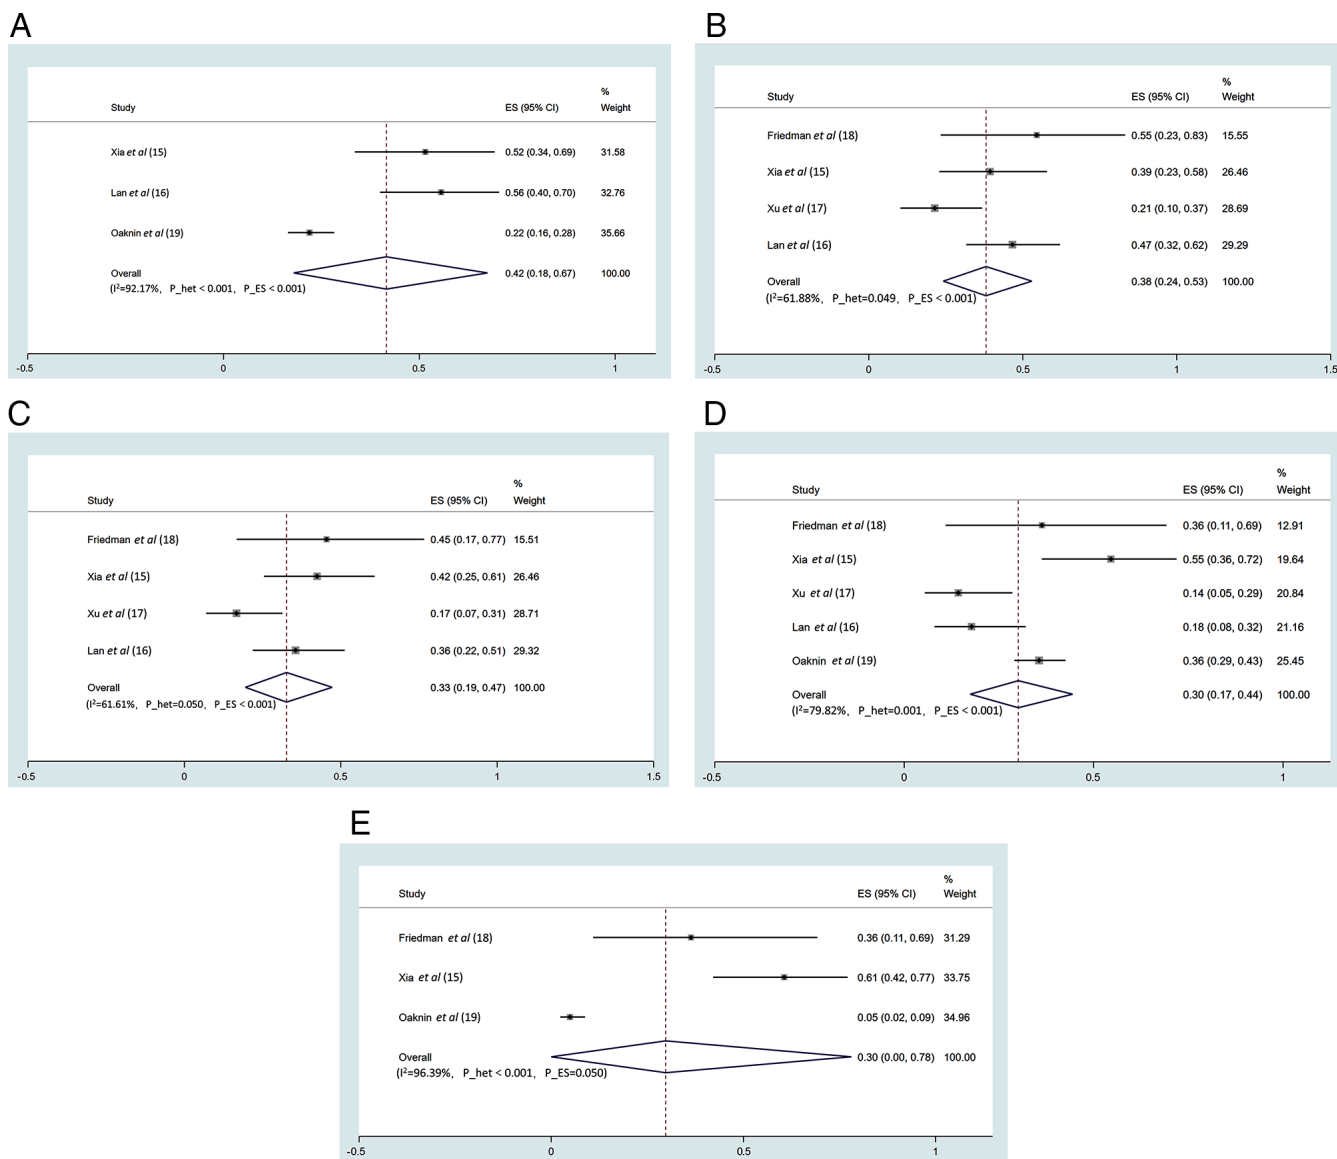

Supplement: Supplementary file 1 [file downloadSupplementary]
